# Supplementary material for: Can Sleep and Resting Behaviours Be Used as Indicators of Welfare in Shelter Dogs (Canis lupus familiaris)?
Source: PLoS One. 2016 Oct 12;11(10):e0163620. doi: 10.1371/journal.pone.0163620 (PMC5061428; doi:10.1371/journal.pone.0163620)
Supplement: S2 Table — (XLSX) [file pone.0163620.s002.xlsx]

## Sheet: Sheet1
	Type	Alma	Drake	Cyril	Benny	Marley	Glenn	Flower	Erik	Toby	Jake	Wilson	Star	Quartz	Hulk	River	Kyla	Loki
No of trials to reach criteria	No of trials before behaviour learnt	17	18	34	22	28	19	18	16	24	20	51	18	33	24	23	29	16
1	Np	1.87	1.69	02:11:00	3.65	2.35	2.51	2.71	3	1.09	2.73	2.85	2.04	1.56	2.15	2.92	0.65	2.42
2	P	3	1.78	0.0909722	7.2	1.76	3.03	2.42	30	0.67	2.85	3.58	2.34	1.75	2.93	3.2	2.88	2.74
3	N	30	30	3.55	30	30	30	30	30	2.53	30	13.14	30	30	2.66	30	30	4.65
4	N	30	30	4.6	30	30	30	30	30	3.11	30	30	30	30	30	3.96	30	3.08
5	P	2.06	1.31	3.13	3.36	1.95	10.61	2.43	2.32	2.44	2.42	2.74	2.98	2.16	2.59	1.93	11.04	3.22
6	A	4.38	30	2.91	30	2.58	3.53	3.29	4.45	2.33	2.36	3.57	30	2.56	3.44	3.05	3.49	2.26
7	P	3.53	1.73	1.95	2.51	1.97	3.49	1.82	2.44	1.98	1.23	3.06	1.62	2.52	2.88	2.28	8.02	2.95
8	P	3.07	1.32	2.44	10	1.8	2.49	2.56	2.53	1.45	1.63	6.56	3.47	1.41	2.72	2.74	2.37	3.16
9	N	30	30	5.69	4.84	30	6.89	3.82	30	2.54	30	5.41	30	1.59	4.09	30	2.64	2.93
10	N	30	2.71	30	30	30	4.99	30	30	30	10.28	30	30	30	30	3.47	30	30
11	nn	4.98	30	30	30	2.45	30	30	30	5.57	30	30	3.24	3.18	6.66	3.97	30	3.13
12	P	1.15	1	2.62	1.95	2.28	2.97	1.91	2.24	1.71	2.02	3.1	1.82	2.01	2.52	3.18	3.62	2.01
13	N	30	30	4.07	30	30	4.39	30	30	30	30	30	3.18	30	30	30	30	3.78
14	P	2.66	2.1	2.79	2.5	1.58	3.98	2.23	2.17	1.2	2.16	2.74	1.79	1.94	3.01	3.23	3.46	2.71
15	N	30	2.2	3.05	3.6	30	30	30	30	2.79	30	30	30	1.72	3.51	30	3.41	30
16	A	3.91	2.47	2.67	3.34	30	3.32	30	30	1.71	4.21	30	2.78	2.25	30	2.76	30	3.45
17	P	2.38	1.67	2.58	2.28	2.43	3	2.15	2.23	1.85	2.12	2.81	2.01	1.86	2.2	2.38	3.19	2.93
18	N	30	30	30	30	30	30	30	30	2.13	30	30	30	30	3.21	30	2.82	30
19	P	2.12	1.98	1.75	2.64	1.47	3.37	2.71	1.96	1.96	2.1	1.98	2.58	1.72	3.3	2.7	2.86	2.91
20	N	30	30	30	30	30	30	30	30	30	30	18.98	3.63	30	30	30	2.71	30
21	Np	2.91	2.11	1.75	2.19	2.06	3.53	4.08	3.25	2	3.16	3.01	2.82	2.38	3.86	3.43	3.44	3
22	N	30	30	4.96	30	30	30	30	30	30	30	5.32	30	30	5.5	30	30	30
23	P	3.61	1.82	2.36	2.77	2.78	2.44	1.85	2.22	2.44	2.15	2.76	1.85	2.5	2.85	3.03	1.97	3.02
24	P	1.66	1.98	1.92	2.04	2.23	2.66	2.21	2.35	1.41	2.49	3.11	2.36	1.28	2.82	1.75	2.51	2.72
25	N	6.92	3.28	4.77	30	30	30	30	30	3.74	2.83	30	3.42	2.01	30	30	3.56	30
26	NN	30	30	3.96	30	30	30	30	30	30	30	30	3.05	30	30	3.72	3.99	3.22
27	p	2.31	1.91	2.6	2.95	2.3	3.66	2.15	2.48	1.63	2.03	3.11	1.53	2.28	2.96	2.58	2.78	2.56
28	p	2.51	1.12	2.67	2.54	2.13	3.64	1.55	2.73	1.92	3.22	2.26	2.76	1.74	2.49	2.92	2.81	2.9
29	n	30	2.71	30	30	30	30	3.53	30	30	30	30	30	30	30	3.06	30	30
30	n	30	30	30	30	30	30	3.92	30	30	30	30	30	30	30	30	30	30
31	nn	4.86	30	30	30	2.81	30	3.1	30	3.17	5.21	5.29	30	30	30	3.04	30	30
32	p	1.18	2.21	2.86	1.93	2.22	2.5	1.54	2.35	1.11	2.64	2.46	3.54	1.77	2.12	3.15	3.04	2.29
33	n	30	3.01	30	30	30	30	30	30	30	30	30	3.82	30	2.76	30	30	3.37
34	n	30	30	30	30	30	30	30	30	30	30	30	30	13.24	30	30	30	30
35	p	1.64	1.96	2.54	2.96	2.29	2.26	1.97	3.1	1.4	1.24	2.71	2.61	1.71	2.81	3.18	2.71	3.06
36	np	3.08	1.47	2.64	2.97	1.31	2.72	2.96	4.35	3.23	1.59	3.43	1.85	2.38	3.08	3.26	2.7	3.37
37	n	30	30	30	30	30	30	30	30	30	30	30	30	30	30	30	30	30
38	p	1.62	1.69	2.61	3.25	2.24	3.91	2.87	2.69	1.92	1.53	3.04	2.94	2.09	2.76	3.28	3.42	2.58
39	n	30	30	4.59	30	30	30	4.09	3.61	2.05	30	30	30	30	30	30	30	30
40	p	3.01	1.47	1.96	1.97	2.25	2.03	2.38	2.18	1.53	2.76	2.97	2.96	1.63	2.62	2.9	2.97	2.9
41	a	30	1.99	3.24	30	2.02	30	30	30	2.21	2.66	30	3.14	3.13	3.3	3.64	3.16	4.27	avg	se
Reverse		30	30	14.54	30	30	15.55	13.87	30	12.57	4.33	13.22	3.22	3.13	4.33	30	4.17	3.51	16.0259	3.88685	4.12311

## Sheet: Sheet2
	P	P	P	Np	Np	Np	A	A	A	Nn	Nn	Nn	N	N	N
Dog
Glenda	Np	1.87	1.69	02:11:00	3.65	2.35	2.51	2.71	3	1.09	2.73	2.85	2.04	1.56	2.15	2.92	0.65	2.42
Archie	P	3	1.78	0.0909722	7.2	1.76	3.03	2.42	30	0.67	2.85	3.58	2.34	1.75	2.93	3.2	2.88	2.74
George	N	30	30	3.55	30	30	30	30	30	2.53	30	13.14	30	30	2.66	30	30	4.65
Styles	N	30	30	4.6	30	30	30	30	30	3.11	30	30	30	30	30	3.96	30	3.08
Castello	P	2.06	1.31	3.13	3.36	1.95	10.61	2.43	2.32	2.44	2.42	2.74	2.98	2.16	2.59	1.93	11.04	3.22
Ace	A	4.38	30	2.91	30	2.58	3.53	3.29	4.45	2.33	2.36	3.57	30	2.56	3.44	3.05	3.49	2.26
Bella	P	3.53	1.73	1.95	2.51	1.97	3.49	1.82	2.44	1.98	1.23	3.06	1.62	2.52	2.88	2.28	8.02	2.95
Bud	P	3.07	1.32	2.44	10	1.8	2.49	2.56	2.53	1.45	1.63	6.56	3.47	1.41	2.72	2.74	2.37	3.16
Nelson	N	30	30	5.69	4.84	30	6.89	3.82	30	2.54	30	5.41	30	1.59	4.09	30	2.64	2.93
Pyra	N	30	2.71	30	30	30	4.99	30	30	30	10.28	30	30	30	30	3.47	30	30
Hemi	nn	4.98	30	30	30	2.45	30	30	30	5.57	30	30	3.24	3.18	6.66	3.97	30	3.13
Clara	P	1.15	1	2.62	1.95	2.28	2.97	1.91	2.24	1.71	2.02	3.1	1.82	2.01	2.52	3.18	3.62	2.01
Frosty	N	30	30	4.07	30	30	4.39	30	30	30	30	30	3.18	30	30	30	30	3.78
Alaska	P	2.66	2.1	2.79	2.5	1.58	3.98	2.23	2.17	1.2	2.16	2.74	1.79	1.94	3.01	3.23	3.46	2.71
Kyla	N	30	2.2	3.05	3.6	30	30	30	30	2.79	30	30	30	1.72	3.51	30	3.41	30
Remi	A	3.91	2.47	2.67	3.34	30	3.32	30	30	1.71	4.21	30	2.78	2.25	30	2.76	30	3.45
Indie	P	2.38	1.67	2.58	2.28	2.43	3	2.15	2.23	1.85	2.12	2.81	2.01	1.86	2.2	2.38	3.19	2.93
	N	30	30	30	30	30	30	30	30	2.13	30	30	30	30	3.21	30	2.82	30
	P	2.12	1.98	1.75	2.64	1.47	3.37	2.71	1.96	1.96	2.1	1.98	2.58	1.72	3.3	2.7	2.86	2.91
	N	30	30	30	30	30	30	30	30	30	30	18.98	3.63	30	30	30	2.71	30
	Np	2.91	2.11	1.75	2.19	2.06	3.53	4.08	3.25	2	3.16	3.01	2.82	2.38	3.86	3.43	3.44	3
	N	30	30	4.96	30	30	30	30	30	30	30	5.32	30	30	5.5	30	30	30
	P	3.61	1.82	2.36	2.77	2.78	2.44	1.85	2.22	2.44	2.15	2.76	1.85	2.5	2.85	3.03	1.97	3.02
	P	1.66	1.98	1.92	2.04	2.23	2.66	2.21	2.35	1.41	2.49	3.11	2.36	1.28	2.82	1.75	2.51	2.72
	N	6.92	3.28	4.77	30	30	30	30	30	3.74	2.83	30	3.42	2.01	30	30	3.56	30
	NN	30	30	3.96	30	30	30	30	30	30	30	30	3.05	30	30	3.72	3.99	3.22
	p	2.31	1.91	2.6	2.95	2.3	3.66	2.15	2.48	1.63	2.03	3.11	1.53	2.28	2.96	2.58	2.78	2.56
	p	2.51	1.12	2.67	2.54	2.13	3.64	1.55	2.73	1.92	3.22	2.26	2.76	1.74	2.49	2.92	2.81	2.9
	n	30	2.71	30	30	30	30	3.53	30	30	30	30	30	30	30	3.06	30	30
	n	30	30	30	30	30	30	3.92	30	30	30	30	30	30	30	30	30	30
	nn	4.86	30	30	30	2.81	30	3.1	30	3.17	5.21	5.29	30	30	30	3.04	30	30
	p	1.18	2.21	2.86	1.93	2.22	2.5	1.54	2.35	1.11	2.64	2.46	3.54	1.77	2.12	3.15	3.04	2.29
	n	30	3.01	30	30	30	30	30	30	30	30	30	3.82	30	2.76	30	30	3.37
	n	30	30	30	30	30	30	30	30	30	30	30	30	13.24	30	30	30	30
	p	1.64	1.96	2.54	2.96	2.29	2.26	1.97	3.1	1.4	1.24	2.71	2.61	1.71	2.81	3.18	2.71	3.06
	np	3.08	1.47	2.64	2.97	1.31	2.72	2.96	4.35	3.23	1.59	3.43	1.85	2.38	3.08	3.26	2.7	3.37
	n	30	30	30	30	30	30	30	30	30	30	30	30	30	30	30	30	30
	p	1.62	1.69	2.61	3.25	2.24	3.91	2.87	2.69	1.92	1.53	3.04	2.94	2.09	2.76	3.28	3.42	2.58
	n	30	30	4.59	30	30	30	4.09	3.61	2.05	30	30	30	30	30	30	30	30
	p	3.01	1.47	1.96	1.97	2.25	2.03	2.38	2.18	1.53	2.76	2.97	2.96	1.63	2.62	2.9	2.97	2.9
	a	30	1.99	3.24	30	2.02	30	30	30	2.21	2.66	30	3.14	3.13	3.3	3.64	3.16	4.27
