# Supplementary material for: Can Sleep and Resting Behaviours Be Used as Indicators of Welfare in Shelter Dogs (Canis lupus familiaris)?
Source: PLoS One. 2016 Oct 12;11(10):e0163620. doi: 10.1371/journal.pone.0163620 (PMC5061428; doi:10.1371/journal.pone.0163620)
Supplement: S3 Table — (XLSX) [file pone.0163620.s003.xlsx]

## Sheet: Sheet1
	Relaxed	Days of obs	No Rel
Benny	48	50	24
Hulk	65.4762	84	55
Loki	79.6296	54	43
Jake	12.5	64	8
Kyla	5.55556	72	4
Alma	38.8889	54	21
Niko	45.6522	46	21
Marley	0	11	0
Cyril	20.3125	64	13
Drake	63.1579	19	12
Erik	61.6822	107	66
Glenn	85.7143	28	24
Flower	83.871	62	52
Oonagh	59.1549	71	42
Pam	52.1739	12	23
Toby	75.9036	83	63
Wilson	62.0253	79	49
Star	21.25	80	17
Quartz	33.3333	33	11
River	88.8889	81	72
