# Supplementary material for: Can Sleep and Resting Behaviours Be Used as Indicators of Welfare in Shelter Dogs (Canis lupus familiaris)?
Source: PLoS One. 2016 Oct 12;11(10):e0163620. doi: 10.1371/journal.pone.0163620 (PMC5061428; doi:10.1371/journal.pone.0163620)
Supplement: S4 Table — (XLSX) [file pone.0163620.s004.xlsx]

## Sheet: NightnDay_multiple measures
	TotSN	BoutsSN	SEfficiencyN	TotRN	BoutsRN	TotWN	BoutsWN	TotSD	BoutsSD	SEfficiencyD	TotRD	BoutsRD	TotWD	Bed_time	Lat_sleep	Get up time
Benny	579.63	34	64.4033	164.542	73	182.975	36	0	0	0	24.9498	18	515.05	0.709387	0.00105324	0.269537
Benny	584.15	38	64.9056	253.75	103	62.1	38	2.17697	1	0.403143	67.4493	66	470.374	0.726991	0.0186574	0.268576
Benny	615.36	47	68.3733	189.32	98	95.33	39	7.55684	1	1.39941	44.9103	30	487.533	0.711701	0.00336806	0.270313
Benny	591.367	53	65.7074	231.117	122	77.52	45	0	0	0	60.793	69	479.207	0.717396	0.0090625	0.285417
Benny	607.933	50	67.5481	236.383	96	55.6833	32	1.03303	1	0.191303	50.1759	37	488.791	0.723785	0.0154514	0.288634
Hulk	798.42	25	88.7133	90.8167	38	10.97	18	0	0	0	180.401	85	359.599	0.708333	0	0.30169
Hulk	734.77	24	81.6411	132.467	47	10.07	15	12.2781	1	2.27372	252.722	64	274.999	0.714861	0.00652778	0.328484
Hulk	759.98	25	84.4422	90.27	51	49.75	25	0	0	0	150.862	53	389.138	0.709722	0.00138889	0.30434
Hulk	820.05	23	91.1167	60.7	33	19.25	14	35.9749	2	6.66203	86.5904	32	417.435	0.73537	0.027037	0.32441
Hulk	635.3	29	70.5889	220.97	64	43.73	24	0	0	0	247.597	85	292.403	0.774039	0.0240394	0.287801
Loki	540.96	39	60.1067	220	96	140.05	20	21.1695	4	3.92028	192.957	78	325.874	0.73647	0.0281366	0.249306
Loki	555.726	44	61.7473	288.727	127	55.5713	34	9.11063	1	1.68715	248.925	84	281.965	0.739664	0.031331	0.266412
Loki	594.083	44	66.0093	252.75	109	41.7667	25	1.72673	1	0.319765	228.944	64	309.329	0.730833	0.0225	0.296377
Loki	573.667	38	63.7407	227.5	102	47.3667	34	11.0348	1	2.04349	266.469	74	262.496	0.718727	0.0103935	0.262778
Loki	621.45	49	69.05	240.8	129	37.75	27	15.563	1	2.88203	208.754	65	315.683	0.714965	0.00663194	0.3
Jake	582	70	64.6667	276.56	117	41.4333	30	0	0	0	165.472	87	374.528	0.726204	0.0178704	0.298484
Jake	595.606	44	66.1785	76.5045	127	107.522	34	0	0	0	78.2408	35	461.759	0.719086	0.0107523	0.298484
Jake	559.983	70	62.2204	307.717	110	32.3	13	0	0	0	141.199	101	398.801	0.71662	0.00828704	0.267396
Jake	593.5	60	65.9444	261.25	109	45.25	34	0	0	0	138.912	91	401.088	0.708333	0	0.271806
Jake	603.433	71	67.0481	250.533	123	46.0333	46	0	0	0	48.6901	42	491.31	0.716007	0.00767361	0.275347
Kyla	589.383	46	65.487	220.583	74	90.03	29	78.0209	9	14.4483	166.695	42	295.284	0.716319	0.00798611	0.271609
Kyla	680.817	43	75.6463	191.267	74	20.9833	17	23.861	3	4.4187	152.524	47	363.615	0.713542	0.00520833	0.293194
Kyla	593.171	42	65.9079	189.53	54	62.9362	24	49.948	8	9.24963	171.257	50	318.795	0.714838	0.00650463	0.262685
Kyla	661.067	57	73.4519	184.617	73	54.3167	24	8.58401	1	1.58963	68.8607	29	462.555	0.709722	0.00138889	0.311944
Kyla	627.333	49	69.7037	186.4	79	86.2667	35	8.46068	1	1.56679	149.848	48	381.691	0.72	0.0116667	0.310764
Alma	639.483	45	71.0537	203.95	83	54.57	25	4.77907	1	0.885012	62.8525	40	472.368	0.715475	0.0071412	0.272998
Alma	689.517	33	76.613	150.367	51	60.1167	19	34.8634	4	6.45619	53.1538	26	451.983	0.708333	0	0.310359
Alma	762.833	9	84.7593	61.4667	25	75.7	17	37.0775	2	6.8662	65.0704	32	437.852	0.719688	0.0113542	0.272917
Alma	746.033	10	82.8926	93.2667	37	60.7	22	41.9976	1	7.77733	51.8922	43	446.11	0.716794	0.00846065	0.261481
Alma	736.267	9	81.8074	111.967	31	51.7667	22	0	0	0	133.187	73	406.813	0.713414	0.00508102	0.263461
Niko	652.6	20	72.5111	106.117	55	141.28	43	16.179	1	2.99611	97.7302	32	426.091	0.709317	0.000983796	0.234896
Niko	638.383	18	70.9315	61.0667	34	42.5833	21	0	0	0	108.107	44	431.893	0.709722	0.00138889	na
Niko	652.25	17	72.4722	91.7667	45	155.983	32	14.1188	3	2.61459	158.708	69	367.173	0.735856	0.0275231	0.264063
Niko	640.242	18	71.2469	118.008	43	148.234	37	15.2343	3	5.0781	104.343	42	401.143	0.725891	0.0175579	0.274537
Niko	627.883	19	69.7648	129.9	49	142.217	33	31.7443	6	5.87857	90.6855	33	417.57	0.722963	0.0146296	0.288461
Marley	614.234	31	65.2332	235.766	60	37.1123	35	12.01	3	4.00334	132.334	52	411.156	0.723727	0.00706019	0.306389
Marley	655.167	30	70.1341	194.833	66	44.3141	40	0	0	0	117.557	59	450.121	0.731389	0.0230556	0.320486
Marley	591.123	22	63.3453	258.877	49	40.7778	22	0	0	0	128.112	42	370.234	0.724375	0.0160417	0.314282
Marley	672.234	36	72.2432	177.766	63	53.3423	23	31	4	7.75	119.334	40	389.111	0.733576	0.0252431	0.319954
Marley	620.517	35	68.9463	236.2	64	41.12	31	16.875	2	3.125	123.977	49	399.148	0.736493	0.0281597	0.318206
Cyril	676.71	40	75.19	146.617	68	32.2833	19	43.2841	3	8.01558	63.5207	29	433.195	0.709722	0.00138889	0.303484
Cyril	764.417	15	84.9352	85.1667	32	50.4167	18	0	0	0	229.279	17	310.721	0.711227	0.00289352	0.274317
Cyril	772.95	17	85.8833	61.4833	32	65.5667	22	26.6504	5	4.93526	96.2387	29	417.111	0.710683	0.00234954	0.293322
Cyril	631.983	36	70.2204	221.183	68	46.8333	20	0	0	0	94.4051	29	445.595	0.729919	0.0215856	0.298067
Cyril	701.2	19	77.9111	87.8333	39	110.967	36	28.3616	1	5.25214	64.4783	17	447.16	0.732905	0.0245718	0.297465
Drake	654.883	39	72.7648	209.367	76	35.75	28	0	0	0	135.727	33	404.273	0.717477	0.00914352	0.262882
Drake	627.583	42	69.7315	248.317	70	24.1	25	34.0349	6	6.30276	61.7057	23	444.259	0.709722	0.00138889	0.275486
Drake	644.633	32	71.6259	211.95	72	43.4167	28	6.94993	2	1.28702	148.503	65	384.547	0.709954	0.00162037	0.262338
Drake	628.858	37	69.8731	181.023	69	33.3556	18	33.797	6	6.25871	110.805	46	395.398	0.708333	0	0.313333
Drake	656.017	30	72.8907	204.517	62	39.4667	29	21.3997	6	3.9629	140.236	87	378.364	0.717928	0.00959491	0.272234
Erik	708.6	34	78.7333	153.35	76	28.03	35	20.808	4	3.85333	103.01	57	416.182	0.717361	0.00902778	0.286134
Erik	685.85	23	76.2056	97.1333	41	117.017	27	37.6284	4	6.96822	127.904	68	374.468	0.731701	0.0233681	0.254942
Erik	694.75	36	77.1944	148.417	65	56.8333	21	19.7277	1	3.65328	102.041	43	418.231	0.717303	0.00896991	0.274595
Erik	622.317	29	69.1463	209.8	70	67.8833	32	39.0945	2	7.23972	164.099	36	336.807	0.737396	0.0290625	0.275903
Erik	587.9	31	65.3222	239.383	74	72.7167	33	26.3444	2	4.87859	135.163	39	378.492	0.728785	0.0204514	0.278229
Glenn	721.68	12	80.1867	127.2	39	51.1167	21	38.9518	3	7.2133	192.711	64	308.337	0.753738	0.00373843	0.282512
Glenn	719.767	21	79.9741	127.117	56	53.1167	26	12.55	1	2.32407	207.983	45	319.467	0.726574	0.0182407	0.29184
Glenn	741.35	21	82.3722	100.683	45	57.9667	27	0	0	0	185.83	72	354.17	0.708333	0	0.268785
Glenn	662.4	26	73.6	177.383	60	60.2167	27	0	0	0	100.527	32	439.473	0.715648	0.00731481	0.251944
Glenn	646.8	20	71.8667	199.133	64	54.0667	27	0	0	0	162.105	60	377.895	0.718623	0.0102894	0.262269
Flower	688.13	22	76.4589	168	64	43.87	30	0	0	0	121.833	53	418.167	0.710683	0.00234954	0.318079
Flower	660.033	29	73.337	176.6	83	63.3667	47	30.0043	1	5.55635	89.1303	53	420.865	0.715613	0.00728009	0.293519
Flower	622.583	27	69.1759	206.117	68	71.3	34	13.589	1	2.51648	95.3308	26	431.08	0.718287	0.0099537	0.23544
Flower	639.9	22	71.1	198.767	71	61.3333	29	0	0	0	135.167	35	404.833	0.716667	0.00833333	0.222002
Flower	642.317	22	71.3685	200.5	64	57.1833	30	0	0	0	96.7002	27	443.3	0.736435	0.0281019	0.282674
Oonagh	540.167	28	60.0185	291.2	60	68.63	14	35.8007	3	6.62977	84.7177	26	419.482	0.716424	0.00809028	0.270417
Oonagh	607.583	31	67.5093	221.983	79	58.2167	25	0	0	0	124.795	36	415.205	0.716343	0.00800926	0.289525
Oonagh	522.8	27	58.0889	267.15	83	110.05	23	0	0	0	149.686	31	390.314	0.734155	0.0258218	0.261539
Oonagh	530.389	27	61.0234	253.22	81	122.113	24	0	0	0	121.112	34	405.123	0.729421	0.021088	0.266227
Oonagh	532.367	27	59.1519	241.517	77	126.117	33	0	0	0	68.4309	51	471.569	0.733067	0.0247338	0.292639
Pam	634.833	31	70.537	220.783	86	44.38	26	0	0	0	144.552	67	395.448	0.730949	0.0226157	0.265856
Pam	637.983	25	70.887	215.75	73	44.2667	25	0	0	0	103.136	37	436.864	0.745394	0.0370602	0.251644
Pam	643.483	34	71.4981	203.433	79	53.0833	26	6.30375	1	6.30375	176.033	73	357.663	0.721343	0.0130093	0.297234
Pam	644.324	32	70.2342	217.454	81	44.222	26	5.2342	1	5.2342	134.195	66	372.116	0.72941	0.0210764	0.262072
Pam	632.6	33	72.2241	205.123	79	55.231	25	0	0	0	140.713	60	380.134	0.723588	0.0152546	0.279294
