# Supplementary material for: Can Sleep and Resting Behaviours Be Used as Indicators of Welfare in Shelter Dogs (Canis lupus familiaris)?
Source: PLoS One. 2016 Oct 12;11(10):e0163620. doi: 10.1371/journal.pone.0163620 (PMC5061428; doi:10.1371/journal.pone.0163620)
Supplement: S5 Table — Averaged scores for all welfare measurements for each dog (i.e. repetitive behaviour, vocal behaviour etc.). (XLSX) [file pone.0163620.s005.xlsx]

## Sheet: Sheet1
Dog	Repetitive	Vocal	Licks	Panting	Relaxed	Weight
Benny	21.8667	33.1667	0.8	4.46667	48	16.5
Hulk	1.8	19.9	2.6	0.5	65.4762	31
Loki	1.63333	1.86667	8.4	44.1333	79.6296	48.5
Jake	6.06665	17.3333	8.2	15.2667	12.5	34
Kyla	1.6	1.5	3.2	0	5.55556	41.5
Alma	28.7	5	7.2	0	38.8889	23
Niko	0.874992	2.375	3.5	0.249992	45.6522	34
Marley	4.83333	17.8333	25	0	0	19.5
Cyril	8.53333	62	14.8	0.966667	20.3125	50
Drake	5.18333	0.166667	8.8	0.0666667	63.1579	32
Erik	4.03333	3.13333	1.8	0	61.6822	32.9
Glenn	0	63.4333	4.6	3.53332	85.7143	22
Flower	0	18.5333	2.2	0	83.871	22
Oonagh	27.0556	4.11111	1.66667	0	59.1549	26
Pam	1.94444	10.5556	0.666667	0	47.82	21.5
